# Supplementary material for: Effect of a conditional cash transfer programme on leprosy treatment adherence and cure in patients from the nationwide 100 Million Brazilian Cohort: a quasi-experimental study
Source: PubMed Central journal article supplement (PMC7191267; doi:10.1016/s1473-3099(19)30624-3), 2020-05
Supplement: mmc1.pdf [file mmc1.pdf]

# THE LANCET Infectious Diseases

## Supplementary webappendix

This webappendix formed part of the original submission and has been peer reviewed. We post it as supplied by the authors.

Supplement to: Pescarini JM, Williamson E, Nery JS, et al. Effect of a conditional cash transfer programme on leprosy treatment adherence and cure in patients from the nationwide 100 Million Brazilian Cohort: a quasi-experimental study. *Lancet Infect Dis* 2020; published online Feb 14. [https://doi.org/10.1016/S1473-3099\(19\)30624-3](https://doi.org/10.1016/S1473-3099(19)30624-3).

## Supplementary material

**Table S1 Profile of new applicant families in Cadastro Único from 2007 to 2014 that had a new leprosy case in the same period prior and after exclusion of partial BFP receivers, individuals with missing data, and those with income >200 (N=22 909).**

| Social and demographical variables                    | N (%) or Median (IQR) |                            |                               |
|-------------------------------------------------------|-----------------------|----------------------------|-------------------------------|
|                                                       | Overall<br>(N=22 909) | Study sample<br>(N=11 546) | Excluded sample<br>(N=11 453) |
| <b><i>Individual variables</i></b>                    |                       |                            |                               |
| Age at registration                                   | 35.5 (25.0-53.2)      | 31.0 (22.1-44.4)           | 43.7 (28.3-61.5)              |
| Age at diagnosis                                      | 38.5 (27.7-55.8)      | 34.0 (24.8-47.4)           | 46.3 (30.8-64.0)              |
| <b>Sex</b>                                            |                       |                            |                               |
| Males                                                 | 11561 (50.5)          | 5398 (47.1)                | 6163 (53.8)                   |
| Females                                               | 11348 (49.5)          | 6058 (52.9)                | 5290 (46.2)                   |
| <b>Ethnicity</b>                                      |                       |                            |                               |
| White                                                 | 4282 (18.7)           | 1884 (16.4)                | 2398 (20.9)                   |
| Non-white (Asian, Indigenous, Blacks and Mixed Black) | 18181 (79.4)          | 9405 (82.1)                | 8776 (76.6)                   |
| Missing                                               | 446 (1.9)             | 167 (1.5)                  | 279 (2.4)                     |
| <b>Education</b>                                      |                       |                            |                               |
| Illiterate                                            | 3844 (16.8)           | 1635 (14.3)                | 2209 (19.3)                   |
| Primary school or less ( $\leq 5$ years of education) | 8533 (37.2)           | 4291 (37.5)                | 4242 (37.0)                   |
| Junior high school ( $\leq 9$ years of education)     | 5669 (24.7)           | 3154 (27.5)                | 2515 (22.0)                   |
| High school ( $\geq 10$ years of education)           | 2322 (10.1)           | 1132 (9.9)                 | 1190 (10.4)                   |
| Missing                                               | 2541 (11.1)           | 1244 (10.9)                | 1297 (11.3)                   |
| <b>Work</b>                                           |                       |                            |                               |
| Employed                                              | 10063 (43.9)          | 6091 (53.2)                | 3972 (34.7)                   |
| Unemployed                                            | 10473 (45.7)          | 5220 (45.6)                | 5253 (45.9)                   |
| Missing                                               | 2373 (10.4)           | 145 (1.3)                  | 2228 (19.5)                   |
| <b><i>Clinical variables</i></b>                      |                       |                            |                               |
| <b>Operational classification</b>                     |                       |                            |                               |
| Paucibacillary                                        | 9162 (40.0)           | 5140 (44.9)                | 4022 (35.1)                   |
| Multibacillary                                        | 13745 (60.0)          | 6316 (55.1)                | 7429 (64.9)                   |
| Missing                                               | 2 (0.0)               | 0 (0.0)                    | 2 (0.0)                       |
| <b>Disabilities at diagnosis</b>                      |                       |                            |                               |
| Grade 0                                               | 14441 (63.0)          | 7658 (66.8)                | 6783 (59.2)                   |
| Grade 1                                               | 4852 (21.2)           | 2210 (19.3)                | 2642 (23.1)                   |
| Grade 2                                               | 1387 (6.1)            | 601 (5.2)                  | 786 (6.9)                     |
| Not evaluated or missing                              | 2229 (9.7)            | 987 (8.6)                  | 1242 (10.8)                   |
| <b>Treatment adherence<sup>3</sup></b>                |                       |                            |                               |
| No                                                    | 3871 (16.9)           | 1948 (17.0)                | 1923 (16.8)                   |
| Yes                                                   | 17446 (76.2)          | 9508 (83.0)                | 7938 (69.3)                   |
| Missing                                               | 1592 (6.9)            | 0 (0.0)                    | 1592 (13.9)                   |
| <b>Cure</b>                                           |                       |                            |                               |
| No                                                    | 2828 (12.3)           | 1379 (12.0)                | 1449 (12.7)                   |

|                                                                               |                   |               |                  |
|-------------------------------------------------------------------------------|-------------------|---------------|------------------|
| Yes                                                                           | 19003 (82.9)      | 10077 (88.0)  | 8926 (77.9)      |
| Missing                                                                       | 1078 ( 4.7)       | 0 ( 0.0)      | 1078 ( 9.4)      |
| <b><i>Familial variables</i></b>                                              |                   |               |                  |
| <b>Bolsa familia receipt</b>                                                  |                   |               |                  |
| No                                                                            | 9369 (40.9)       | 2706 (23.6)   | 6663 (58.2)      |
| Yes                                                                           | 13540 (59.1)      | 8750 (76.4)   | 4790 (41.8)      |
| <b>Region of residence</b>                                                    |                   |               |                  |
| North                                                                         | 5267 (23.0)       | 2949 (25.7)   | 2318 (20.2)      |
| Northeast                                                                     | 9514 (41.5)       | 4995 (43.6)   | 4519 (39.5)      |
| Southeast                                                                     | 3187 (13.9)       | 1527 (13.3)   | 1660 (14.5)      |
| South                                                                         | 634 ( 2.8)        | 222 ( 1.9)    | 412 ( 3.6)       |
| Midwest                                                                       | 4307 (18.8)       | 1763 (15.4)   | 2544 (22.2)      |
| <b>Area of residence</b>                                                      |                   |               |                  |
| Urban                                                                         | 18179 (79.4)      | 8806 (76.9)   | 9373 (81.8)      |
| Rural                                                                         | 4709 (20.6)       | 2650 (23.1)   | 2059 (18.0)      |
| Missing                                                                       | 21 ( 0.1)         | 0 ( 0.0)      | 21 ( 0.2)        |
| <b>Type of the household</b>                                                  |                   |               |                  |
| Private                                                                       | 20113 (87.8)      | 11208 (97.8)  | 8905 (77.8)      |
| Shared and informal housing                                                   | 666 ( 2.9)        | 248 ( 2.2)    | 418 ( 3.6)       |
| Missing                                                                       | 2130 ( 9.3)       | 0 ( 0.0)      | 2130 (18.6)      |
| <b>Construction material</b>                                                  |                   |               |                  |
| Bricks/cement                                                                 | 15721 (68.6)      | 7641 (66.7)   | 8080 (70.5)      |
| Wood, other vegetal materials, or other                                       | 6875 (30.0)       | 3815 (33.3)   | 3060 (26.7)      |
| Missing                                                                       | 313 ( 1.4)        | 0 ( 0.0)      | 313 ( 2.7)       |
| <b>Water supply (tap water)</b>                                               |                   |               |                  |
| Public network (tap water)                                                    | 15446 (67.4)      | 7449 (65.0)   | 7997 (69.8)      |
| Well, natural sources, or other                                               | 7150 (31.2)       | 4007 (35.0)   | 3143 (27.4)      |
| Missing                                                                       | 313 ( 1.4)        | 0 ( 0.0)      | 313 ( 2.7)       |
| <b>Electricity</b>                                                            |                   |               |                  |
| Yes with counter                                                              | 18957 (82.7)      | 9246 (80.7)   | 9711 (84.8)      |
| Electricity without counter or no electricity                                 | 3639 (15.9)       | 2210 (19.3)   | 1429 (12.5)      |
| Missing                                                                       | 313 ( 1.4)        | 0 ( 0.0)      | 313 ( 2.7)       |
| <b>Missing</b>                                                                |                   |               |                  |
| Missing                                                                       | 313 ( 1.4)        | 0 ( 0.0)      | 313 ( 2.7)       |
| <b>Sewage</b>                                                                 |                   |               |                  |
| Public network or septic tank                                                 | 11801 (51.5)      | 5720 (49.9)   | 6081 (53.1)      |
| Homemade septic tank, ditch, or other                                         | 10416 (45.5)      | 5736 (50.1)   | 4680 (40.9)      |
| Missing                                                                       | 692 ( 3.0)        | 0 ( 0.0)      | 692 ( 6.0)       |
| <b>Waste</b>                                                                  |                   |               |                  |
| Public collection system                                                      | 17083 (74.6)      | 8377 (73.1)   | 8706 (76.0)      |
| Burned, buried, outdoor disposal, or other                                    | 5513 (24.1)       | 3079 (26.9)   | 2434 (21.3)      |
| Missing                                                                       | 313 ( 1.4)        | 0 ( 0.0)      | 313 ( 2.7)       |
| <b>Individuals per family</b>                                                 | 3 (2.4)           | 3 (2.4)       | 2 (1.3)          |
| <b>Residents per room</b>                                                     | 0.8 (0.4-1.0)     | 1.0 (0.6-1.3) | 0.5 (0.3-1.0)    |
| <b>Monthly family income (BRL)</b>                                            | 200 (100-465)     | 150 (80-300)  | 380 (120-622)    |
| <b>Monthly per capita income (BRL) adjusted for BFP threshold<sup>1</sup></b> | 64.3 (31.0-171.4) | 50 (25-85.7)  | 128.5 (42.8-380) |

<sup>1</sup> As the income threshold for BFP eligibility increased by 1.167 in August 2009, the monthly per capita income was divided by 1.167 for families registering with CadUnico after August 2009 in this study.

**Table S2 Logistic regression to estimate the probability of receiving BFP benefit according to covariates (N= 11 456).**

| <b>Social and demographical variables</b>             | <b>Overall</b>   | <b>PB</b>        | <b>MB</b>        |
|-------------------------------------------------------|------------------|------------------|------------------|
|                                                       | OR (95% CI)      | OR (95% CI)      | OR (95% CI)      |
| <b>Intercept</b>                                      | 3.92 (2.83-5.42) | 3.98 (2.44-6.51) | 4.08 (2.63-6.33) |
| <b><u>Individual variables</u></b>                    |                  |                  |                  |
| <b>Age at registration</b>                            | 0.97 (0.97-0.98) | 0.97 (0.97-0.98) | 0.97 (0.97-0.98) |
| <b>Sex</b>                                            |                  |                  |                  |
| Males                                                 | 1.00             | 1.00             | 1.00             |
| Females                                               | 1.09 (0.99-1.21) | 1.17 (1.1-37)    | 1.1 (0.96-1.25)  |
| <b>Ethnicity</b>                                      |                  |                  |                  |
| White                                                 | 1.00             | 1.00             | 1.00             |
| Non-white (Asian, Indigenous, Blacks and Mixed Black) | 1 (0.88-1.14)    | 1.11 (0.91-1.35) | 0.93 (0.78-1.12) |
| Missing                                               | 1.71 (1.12-2.67) | 2.50 (1.24-5.05) | 1.32 (0.76-2.31) |
| <b>Education</b>                                      |                  |                  |                  |
| Illiterate                                            | 1.00             | 1.00             | 1.00             |
| Primary school or less ( $\leq 5$ years of education) | 1.09 (0.94-1.27) | 0.93 (0.72-1.21) | 1.19 (0.99-1.43) |
| Junior high school ( $\leq 9$ years of education)     | 1.13 (0.96-1.33) | 0.94 (0.71-1.23) | 1.27 (1.03-1.58) |
| High school ( $\geq 10$ years of education)           | 0.88 (0.71-1.07) | 0.71 (0.52-0.97) | 1.01 (0.76-1.34) |
| Missing                                               | 0.75 (0.62-0.91) | 0.65 (0.48-0.88) | 0.81 (0.63-1.06) |
| <b>Work</b>                                           |                  |                  |                  |
| Employed                                              | 1.00             | 1.00             | 1.00             |
| Unemployed                                            | 0.8 (0.72-0.89)  | 0.82 (0.69-0.96) | 0.79 (0.68-0.92) |
| Missing                                               | 1.6 (0.98-2.69)  | 1.14 (0.51-2.56) | 1.93 (1.01-3.69) |
| <b><u>Familial variables</u></b>                      |                  |                  |                  |
| <b>Region of residence</b>                            |                  |                  |                  |
| North                                                 | 1.00             | 1.00             | 1.00             |
| Northeast                                             | 1.28 (1.11-1.47) | 1.27 (1.03-1.56) | 1.29 (1.06-1.55) |
| Southeast                                             | 1.67 (1.38-2.01) | 1.60 (1.22-2.11) | 1.75 (1.36-2.25) |
| South                                                 | 1.14 (0.82-1.61) | 1.59 (0.77-3.29) | 1.00 (0.68-1.49) |
| Midwest                                               | 1.31 (1.11-1.54) | 1.33 (1.02-1.72) | 1.27 (1.03-1.58) |
| <b>Area of residence</b>                              |                  |                  |                  |
| Urban                                                 | 1.00             | 1.00             | 1.00             |
| Rural                                                 | 0.99 (0.84-1.17) | 0.98 (0.76-1.26) | 1.02 (0.82-1.27) |
| <b>Type of the household</b>                          |                  |                  |                  |
| Private                                               | 1.00             | 1.00             | 1.00             |
| Shared and informal housing                           | 1.07 (0.75-1.55) | 0.99 (0.59-1.66) | 1.16 (0.7-1.92)  |
| <b>Construction material</b>                          |                  |                  |                  |
| Bricks/cement                                         | 1.00             | 1.00             | 1.00             |
| Wood, other vegetal materials, or other               | 0.99 (0.87-1.13) | 0.93 (0.76-1.13) | 1.04 (0.88-1.23) |
| <b>Water supply (tap water)</b>                       |                  |                  |                  |
| Public network (tap water)                            | 1.00             | 1.00             | 1.00             |
| Well, natural sources, or other                       | 1.16 (1.02-1.32) | 1.06 (0.87-1.29) | 1.23 (1.04-1.47) |
| <b>Electricity</b>                                    |                  |                  |                  |

|                                                                       |                  |                  |                  |
|-----------------------------------------------------------------------|------------------|------------------|------------------|
| Yes with counter                                                      | 1.00             | 1.00             | 1.00             |
| Electricity without counter or no electricity                         | 1.08 (0.93-1.25) | 1.1 (0.88-1.38)  | 1.07 (0.87-1.31) |
| <b>Sewage</b>                                                         |                  |                  |                  |
| Public network or septic tank                                         | 1.00             | 1.00             | 1.00             |
| Homemade septic tank, ditch, or other                                 | 1.07 (0.96-1.2)  | 1.11 (0.94-1.31) | 1.05 (0.91-1.22) |
| <b>Waste</b>                                                          |                  |                  |                  |
| Public collection system                                              | 1.00             | 1.00             | 1.00             |
| Burned, buried, outdoor disposal, or other                            | 0.9 (0.76-1.06)  | 0.88 (0.68-1.13) | 0.91 (0.73-1.13) |
| <b>Residents per room (household density)</b>                         | 1.53 (1.41-1.67) | 1.55 (0.1-0)     | 1.51 (0.09-0)    |
| <b>Per capita income (BRL) adjusted for BFP threshold<sup>1</sup></b> |                  |                  |                  |
| 0                                                                     | 1.00             | 1.00             | 1.00             |
| 0 -  50                                                               | 1.48 (1.25-1.77) | 1.62 (1.25-2.11) | 1.39 (1.1-1.75)  |
| 50 -  100                                                             | 0.81 (0.68-0.95) | 0.79 (0.61-1.02) | 0.83 (0.66-1.04) |
| 100 -  150                                                            | 0.42 (0.34-0.5)  | 0.4 (0.3-0.54)   | 0.43 (0.33-0.55) |
| 150 -  200                                                            | 0.14 (0.11-0.17) | 0.14 (0.1-0.19)  | 0.14 (0.1-0.19)  |
| <b>Year of registry</b>                                               |                  |                  |                  |
| 2007                                                                  | 1.00             | 1.00             | 1.00             |
| 2008                                                                  | 1.42 (1.25-1.61) | 1.31 (1.08-1.58) | 1.54 (1.3-1.84)  |
| 2009                                                                  | 2.62 (2.24-3.07) | 2.43 (1.92-3.07) | 2.82 (2.28-3.49) |
| 2010                                                                  | 2.01 (1.64-2.49) | 2.13 (1.53-2.95) | 1.97 (1.5-2.59)  |
| 2011                                                                  | 1.13 (0.89-1.45) | 1.14 (0.77-1.68) | 1.15 (0.84-1.59) |
| 2012                                                                  | 0.74 (0.61-0.91) | 0.57 (0.41-0.77) | 0.91 (0.69-1.2)  |
| 2013                                                                  | 0.56 (0.4-0.77)  | 0.68 (0.41-1.12) | 0.49 (0.32-0.74) |
| 2014                                                                  | 0.35 (0.2-0.6)   | 0.16 (0.06-0.44) | 0.53 (0.27-1.04) |

MB: multibacillary, PB: paucibacillary, OR: odds ratio

<sup>1</sup>As the income threshold for BFP eligibility increased by 1.167 in August 2009, the monthly per capita income was divided by 1.167 for families registering with CadUnico after August 2009 in this study.

**Table S3 Logistic regression to estimate the probability of receiving BFP benefit according to covariates for children under 15 (N= 1726).**

| <b>Social and demographical variables</b>             | <b>Overall</b>    | <b>PB</b>         | <b>MB</b>         |
|-------------------------------------------------------|-------------------|-------------------|-------------------|
|                                                       | OR (95% CI)       | OR (95% CI)       | OR (95% CI)       |
| <b>Intercept</b>                                      | 1.41 (0.41-5.06)  | 1.07 (0.22-5.31)  | 3.11 (0.27-35.76) |
| <b><u>Individual variables</u></b>                    |                   |                   |                   |
| <b>Age at diagnosis</b>                               |                   |                   |                   |
| 0-4                                                   | 1.00              | 1.00              | 1.00              |
| 5-9                                                   | 1.76 (0.85-3.42)  | 2.26 (1.03-4.97)  | 0.85 (0.16-4.44)  |
| 10-14                                                 | 1.38 (0.68-2.62)  | 1.84 (0.86-3.96)  | 0.73 (0.14-3.7)   |
| <b>Sex</b>                                            |                   |                   |                   |
| Males                                                 | 1.00              | 1.00              | 1.00              |
| Females                                               | 1.05 (0.76-1.46)  | 1.19 (0.78-1.82)  | 0.80 (0.45-1.4)   |
| <b>Ethnicity</b>                                      |                   |                   |                   |
| White                                                 | 1.00              | 1.00              | 1.00              |
| Non-white                                             | 0.76 (0.45-1.26)  | 0.56 (0.28-1.12)  | 1.19 (0.5-2.84)   |
| Missing                                               | 0.10 (0.02-0.72)  | 0.08 (0.01-0.83)  | 0.16 (0.5-99)     |
| <b>Education (head)</b>                               |                   |                   |                   |
| Illiterate                                            | 1.00              | 1.00              | 1.00              |
| Primary school or less ( $\leq 5$ years of education) | 1.56 (0.92-2.61)  | 1.77 (0.87-3.6)   | 1.08 (0.48-2.43)  |
| Junior high school ( $\leq 9$ years of education)     | 1.53 (0.89-2.6)   | 1.67 (0.81-3.41)  | 1.32 (0.55-3.18)  |
| High school ( $\geq 10$ years of education)           | 1.30 (0.67-2.51)  | 1.33 (0.57-3.08)  | 1.37 (0.41-4.64)  |
| Missing                                               | 0.90 (0.48-1.68)  | 1 (0.44-2.28)     | 0.64 (0.22-1.9)   |
| <b>Work (head)</b>                                    |                   |                   |                   |
| Employed                                              | 1.00              | 1.00              | 1.00              |
| Unemployed                                            | 0.95 (0.66-1.4)   | 0.91 (0.56-1.47)  | 0.95 (0.49-1.85)  |
| Missing                                               | 1.71 (0.34-11.38) | 3.05 (0.27-34.78) | 0.30 (0.01-6.67)  |
| <b><u>Familial variables</u></b>                      |                   |                   |                   |
| <b>Region of residence</b>                            |                   |                   |                   |
| North                                                 | 1.00              | 1.00              | 1.00              |
| Northeast                                             | 2.48 (1.61-3.83)  | 2.51 (1.42-4.41)  | 2.77 (1.35-5.71)  |
| Southeast                                             | 3.17 (1.7-6.15)   | 3.29 (1.5-7.22)   | 2.30 (0.7-7.6)    |
| South                                                 | 1.02 (0.21-6.42)  | 2.22 (0.18-27.16) | 0.14 (0.01-2.69)  |
| Midwest                                               | 2.19 (1.25-3.97)  | 1.8 (0.86-3.77)   | 3.49 (1.21-10.03) |
| <b>Area of residence</b>                              |                   |                   |                   |
| Urban                                                 | 1.00              | 1.00              | 1.00              |
| Rural                                                 | 0.98 (0.57-1.71)  | 1.44 (0.69-2.98)  | 0.43 (0.18-1.04)  |
| <b>Type of the household</b>                          |                   |                   |                   |
| Private                                               | 1.00              | 1.00              | 1.00              |
| Shared and informal housing                           | 1.25 (0.44-4.53)  | 0.78 (0.23-2.68)  | 1 (0-0)           |
| <b>Construction material</b>                          |                   |                   |                   |
| Bricks/cement                                         | 1.00              | 1.00              | 1.00              |
| Wood, other vegetal materials, or other               | 1.27 (0.83-1.94)  | 1.21 (0.7-2.09)   | 1.38 (0.65-2.94)  |
| <b>Water supply (tap water)</b>                       |                   |                   |                   |

|                                                                       |                   |                   |                    |
|-----------------------------------------------------------------------|-------------------|-------------------|--------------------|
| Public network (tap water)                                            | 1.00              | 1.00              | 1.00               |
| Well, natural sources, or other                                       | 0.90 (0.60-1.36)  | 0.92 (0.54-1.59)  | 0.74 (0.38-1.44)   |
| <b>Electricity</b>                                                    |                   |                   |                    |
| Yes with counter                                                      | 1.00              | 1.00              | 1.00               |
| Electricity without counter or no electricity                         | 1.64 (1.01-2.74)  | 1.39 (0.74-2.6)   | 2.68 (1.11-6.46)   |
| <b>Sewage</b>                                                         |                   |                   |                    |
| Public network or septic tank                                         | 1.00              | 1.00              | 1.00               |
| Homemade septic tank, ditch, or other                                 | 1.25 (0.86-1.81)  | 1.26 (0.79-2.03)  | 1.50 (0.78-2.88)   |
| <b>Waste</b>                                                          |                   |                   |                    |
| Public collection system                                              | 1.00              | 1.00              | 1.00               |
| Burned, buried, outdoor disposal, or other                            | 0.66 (0.38-1.15)  | 0.58 (0.29-1.18)  | 0.86 (0.36-2.1)    |
| <b>Residents per room (household density)</b>                         | 1.39 (1.13-1.75)  | 1.59 (0.26-0)     | 1.23 (0.18-0)      |
| <b>Per capita income (BRL) adjusted for BFP threshold<sup>1</sup></b> |                   |                   |                    |
| 0                                                                     | 1.00              | 1.00              | 1.00               |
| 0 -  50                                                               | 1.23 (0.64-2.3)   | 1.6 (0.72-3.55)   | 0.76 (0.24-2.41)   |
| 50 -  100                                                             | 0.62 (0.32-1.16)  | 0.66 (0.3-1.44)   | 0.53 (0.16-1.8)    |
| 100 -  150                                                            | 0.32 (0.15-0.69)  | 0.37 (0.14-0.96)  | 0.23 (0.06-0.95)   |
| 150 -  200                                                            | 0.02 (0.01-0.06)  | 0.03 (0.01-0.1)   | 0 (0-0.04)         |
| <b>Year of registry</b>                                               |                   |                   |                    |
| 2007                                                                  | 1.00              | 1.00              | 1.00               |
| 2008                                                                  | 1.93 (1.27-2.99)  | 1.67 (0.98-2.85)  | 2.93 (1.32-6.51)   |
| 2009                                                                  | 4.86 (2.61-9.82)  | 5.14 (2.16-12.24) | 5.43 (1.76-16.77)  |
| 2010                                                                  | 4.82 (2.13-12.69) | 4.09 (1.43-11.66) | 8.64 (1.26-59.20)  |
| 2011                                                                  | 1.02 (0.42-2.77)  | 0.80 (0.25-2.57)  | 2.30 (0.33-16.11)  |
| 2012                                                                  | 1.73 (0.77-4.25)  | 1.96 (0.65-5.84)  | 1.06 (0.26-4.33)   |
| 2013                                                                  | 1.69 (0.52-6.34)  | 1.63 (0.36-7.42)  | 1.24 (0.08-18.11)  |
| 2014                                                                  | 0.38 (0.07-2.47)  | 0.08 (0.01-0.91)  | 6.55 (0.15-289.33) |

MB: multibacillary, PB: paucibacillary, OR: odds ratio

<sup>1</sup> As the income threshold for BFP eligibility increased by 1.167 in August 2009, the monthly per capita income was divided by 1.167 for families registering with CadUnico after August 2009 in this study.

**Table S4 Standardized mean differences (SMD) before and after matching for the matching covariates and those used in further adjustment in the overall population.**

|                                                       | Before matching (N= 11 456) |                        |       | After matching (overall) (N= 17 302) |                        |        |
|-------------------------------------------------------|-----------------------------|------------------------|-------|--------------------------------------|------------------------|--------|
|                                                       | Non-BFP                     | BFP                    | SMD   | Non-BFP                              | BFP                    | SMD    |
|                                                       | N or mean<br>(% or sd)      | N or mean<br>(% or sd) |       | N or mean<br>(% or sd)               | N or mean<br>(% or sd) |        |
| <b>Age at registration</b>                            | 39.7 (17.2)                 | 30 (15.9)              | 0.586 | 30.1 (15.4)                          | 30.2 (15.9)            | -0.006 |
| <b>Sex</b>                                            |                             |                        |       |                                      |                        |        |
| Males                                                 | 1344 (49.7)                 | 4054 (46.3)            | 0.067 | 4208 (48.6)                          | 4009 (46.3)            | 0.046  |
| Females                                               | 1362 (50.3)                 | 4696 (53.7)            |       | 4443 (51.4)                          | 4642 (53.7)            |        |
| <b>Ethnicity</b>                                      |                             |                        |       |                                      |                        |        |
| White                                                 | 528 (19.5)                  | 1356 (15.5)            | 0.109 | 1310 (15.1)                          | 1347 (15.6)            | 0.028  |
| Non-white                                             | 2133 (78.8)                 | 7272 (83.1)            |       | 7245 (83.7)                          | 7184 (83)              |        |
| Missing                                               | 45 (1.7)                    | 122 (1.4)              |       | 96 (1.1)                             | 120 (1.4)              |        |
| <b>Education</b>                                      |                             |                        |       |                                      |                        |        |
| Illiterate                                            | 421 (15.6)                  | 1214 (13.9)            | 0.150 | 1407 (16.3)                          | 1201 (13.9)            | 0.074  |
| Primary school or less ( $\leq 5$ years of education) | 1018 (37.6)                 | 3273 (37.4)            |       | 3021 (34.9)                          | 3216 (37.2)            |        |
| Junior high school ( $\leq 9$ years of education)     | 624 (23.1)                  | 2530 (28.9)            |       | 2519 (29.1)                          | 2505 (29)              |        |
| High school ( $\geq 10$ years of education)           | 311 (11.5)                  | 821 (9.4)              |       | 782 (9)                              | 820 (9.5)              |        |
| Missing                                               | 332 (12.3)                  | 912 (10.4)             |       | 922 (10.7)                           | 909 (10.5)             |        |
| <b>Work</b>                                           |                             |                        |       |                                      |                        |        |
| Employed                                              | 1289 (47.6)                 | 4802 (54.9)            | 0.157 | 4757 (55)                            | 4734 (54.7)            | 0.038  |
| Unemployed                                            | 1392 (51.4)                 | 1380 (15.8)            |       | 3736 (43.2)                          | 3799 (43.9)            |        |
| Missing                                               | 25 (0.9)                    | 120 (1.4)              |       | 158 (1.8)                            | 118 (1.4)              |        |
| <b>Region of residence</b>                            |                             |                        |       |                                      |                        |        |
| North                                                 | 639 (23.6)                  | 2310 (26.4)            | 0.173 | 2837 (32.8)                          | 2256 (26.1)            | 0.150  |
| Northeast                                             | 1108 (40.9)                 | 3887 (44.4)            |       | 3584 (41.4)                          | 3861 (44.6)            |        |
| Southeast                                             | 362 (13.4)                  | 1165 (13.3)            |       | 1021 (11.8)                          | 1153 (13.3)            |        |
| South                                                 | 86 (3.2)                    | 136 (1.6)              |       | 129 (1.5)                            | 135 (1.6)              |        |
| Midwest                                               | 511 (18.9)                  | 1252 (14.3)            |       | 1080 (12.5)                          | 1246 (14.4)            |        |
| <b>Area of residence</b>                              |                             |                        |       |                                      |                        |        |
| Urban                                                 | 2193 (81)                   | 6613 (75.6)            | 0.133 | 6339 (73.3)                          | 6543 (75.6)            | 0.054  |
| Rural                                                 | 513 (19)                    | 2137 (24.4)            |       | 2312 (26.7)                          | 2108 (24.4)            |        |
| <b>Type of the household</b>                          |                             |                        |       |                                      |                        |        |
| Private                                               | 2663 (98.4)                 | 8545 (97.7)            | 0.054 | 8508 (98.3)                          | 8449 (97.7)            | 0.049  |
| Shared and informal housing                           | 43 (1.6)                    | 205 (2.3)              |       | 143 (1.7)                            | 202 (2.3)              |        |
| <b>Construction material</b>                          |                             |                        |       |                                      |                        |        |
| Bricks/cement                                         | 1954 (72.2)                 | 5687 (65)              | 0.156 | 5361 (62)                            | 5642 (65.2)            | 0.068  |
| Wood, other vegetal materials, or other               | 752 (27.8)                  | 3063 (35)              |       | 3290 (38)                            | 3009 (34.8)            |        |
| <b>Water supply (tap water)</b>                       |                             |                        |       |                                      |                        |        |
| Public network (tap water)                            | 1929 (71.3)                 | 5520 (63.1)            | 0.175 | 5299 (61.3)                          | 5483 (63.4)            | 0.044  |
| Well, natural sources, or other                       | 777 (28.7)                  | 3230 (36.9)            |       | 3352 (38.7)                          | 3168 (36.6)            |        |
| <b>Electricity</b>                                    |                             |                        |       |                                      |                        |        |



|                                                                        |             |             |        |             |             |       |
|------------------------------------------------------------------------|-------------|-------------|--------|-------------|-------------|-------|
| Yes with counter                                                       | 2347 (86.7) | 6899 (78.8) | 0.210  | 6695 (77.4) | 6853 (79.2) | 0.044 |
| Electricity without counter or no electricity                          | 359 (13.3)  | 1851 (21.2) |        | 1956 (22.6) | 1798 (20.8) |       |
| <b>Sewage</b>                                                          |             |             |        |             |             |       |
| Public network or septic tank                                          | 1479 (54.7) | 4241 (48.5) | 0.124  | 4146 (47.9) | 4212 (48.7) | 0.015 |
| Homemade septic tank, ditch, or other                                  | 1227 (45.3) | 4509 (51.5) |        | 4505 (52.1) | 4439 (51.3) |       |
| <b>Waste</b>                                                           |             |             |        |             |             |       |
| Public collection system                                               | 2122 (78.4) | 6255 (71.5) | 0.161  | 6068 (70.1) | 6195 (71.6) | 0.032 |
| Burned, buried, outdoor disposal, or other                             | 584 (21.6)  | 2495 (28.5) |        | 2583 (29.9) | 2456 (28.4) |       |
| <b>Residents per room</b>                                              | 0.8 (0.65)  | 1.2 (0.94)  | -0.443 | 1.2 (1.1)   | 1.1 (0.83)  | 0.107 |
| Per capita income (BRL) adjusted for BFP threshold <sup>1</sup>        |             |             |        |             |             |       |
| 0                                                                      | 342 (12.6)  | 1076 (12.3) | 0.761  | 1144 (13.2) | 1075 (12.4) | 0.052 |
| 0 -  50                                                                | 622 (23.3)  | 4264 (48.7) |        | 4208 (48.6) | 4174 (48.2) |       |
| 50 -  100                                                              | 743 (27.5)  | 2450 (28.0) |        | 2347 (27.1) | 2443 (28.2) |       |
| 100 -  150                                                             | 485 (17.9)  | 741 (8.5)   |        | 683 (7.9)   | 741 (8.6)   |       |
| 150 -  200                                                             | 514 (19.0)  | 219 (2.5)   |        |             |             |       |
| Per capita income (BRL) adjusted for BFP threshold <sup>1</sup> (cont) | 86.8 (60.6) | 51.1 (40.3) | 0.693  | 53.8 (42.7) | 51.4 (40.4) | 0.058 |
| <b>Year of registry</b>                                                |             |             |        |             |             |       |
| 2007                                                                   | 1196 (44.2) | 3842 (43.9) | 0.428  | 3865 (44.7) | 3806 (44.0) | 0.141 |
| 2008                                                                   | 517 (19.1)  | 1963 (22.4) |        | 2351 (27.2) | 1940 (22.4) |       |
| 2009                                                                   | 278 (10.3)  | 1587 (18.1) |        | 1251 (14.5) | 1556 (18.0) |       |
| 2010                                                                   | 158 (5.8)   | 670 (7.7)   |        | 549 (6.3)   | 663 (7.7)   |       |
| 2011                                                                   | 146 (5.4)   | 251 (2.9)   |        | 231 (2.7)   | 250 (2.9)   |       |
| 2012                                                                   | 253 (9.3)   | 301 (3.4)   |        | 277 (3.2)   | 301 (3.5)   |       |
| 2013                                                                   | 111 (4.1)   | 113 (1.3)   |        | 106 (1.2)   | 113 (1.3)   |       |
| 2014                                                                   | 47 (1.7)    | 23 (0.3)    |        | 21 (0.2)    | 22 (0.3)    |       |

Sd: standard deviation, SMD: standardised mean difference.

<sup>1</sup> As the income threshold for BFP eligibility increased by 1.167 in August 2009, the monthly per capita income was divided by 1.167 for families registering with CadUnico after August 2009 in this study.

**Table S5 Complete case analysis after removing individuals with missing in any matching variable. Average treatment effect on the treated (ATT)<sup>1</sup> of Bolsa Familia program (BFP) on leprosy cure and treatment adherence (Brazil, 2007-2014) (N=9 960).**

| Outcome                                | PSM                      |                  |                  | IPTW                     |                  |                  |
|----------------------------------------|--------------------------|------------------|------------------|--------------------------|------------------|------------------|
|                                        | OR (95% CI) <sup>1</sup> |                  |                  | OR (95% CI) <sup>1</sup> |                  |                  |
|                                        | Overall<br>(N=15 130)    | PB<br>(N=6558)   | MB<br>(N=8 316)  | Overall<br>(N=9960)      | PB<br>(N=4373)   | MB<br>(N=5587)   |
| <b>Treatment adherence<sup>2</sup></b> |                          |                  |                  |                          |                  |                  |
| Non-beneficiaries                      | 1.00                     | 1.00             | 1.00             | 1.00                     | 1.00             | 1.00             |
| Beneficiaries                          | 1.17 (0.95-1.43)         | 1.29 (0.92-1.78) | 1.25 (0.98-1.59) | 1.34 (1.11-1.62)         | 1.39 (1.03-1.89) | 1.37 (1.08-1.75) |
| <b>Cure</b>                            |                          |                  |                  |                          |                  |                  |
| Non-beneficiaries                      | 1.00                     | 1.00             | 1.00             | 1.00                     | 1.00             | 1.00             |
| Beneficiaries                          | 1.20 (0.94-1.52)         | 1.08 (0.74-1.57) | 1.20 (0.91-1.59) | 1.24 (1.00-1.56)         | 1.13 (0.80-1.59) | 1.35 (1.02-1.78) |

<sup>1</sup> The average treatment effect was estimated in the propensity score matched (PSM) and inverse probability of the treatment weight (IPTW) analyses.

<sup>2</sup>OR and 95%CI estimated using logistic regression with further adjustment for income.

<sup>3</sup>Completing the minimum number of doses:  $\geq 6$  for PB or  $\geq 12$  for MB.

**Table S6 Sensitivity analysis removing inconsistencies in cure and treatment adherence classification. Average treatment effect on the treated (ATT)<sup>1</sup> of Bolsa Familia program (BFP) on leprosy cure and treatment adherence (Brazil, 2007-2014) (N=10 794).**

| Outcome                                | PSM                     |                  |                  | IPTW                    |                  |                  |
|----------------------------------------|-------------------------|------------------|------------------|-------------------------|------------------|------------------|
|                                        | OR (95%CI) <sup>1</sup> |                  |                  | OR (95%CI) <sup>1</sup> |                  |                  |
|                                        | Overall<br>(N=16 284)   | PB<br>(N=7380)   | MB<br>(N=8680)   | Overall<br>(N=10 794)   | PB<br>(N=4909)   | MB<br>(N=5885)   |
| <b>Treatment adherence<sup>2</sup></b> |                         |                  |                  |                         |                  |                  |
| Non-beneficiaries                      | 1.00                    | 1.00             | 1.00             | 1.00                    | 1.00             | 1.00             |
| Beneficiaries                          | 1.14 (0.91-1.43)        | 1.12 (0.73-1.71) | 1.48 (1.16-1.90) | 1.33 (1.07-1.65)        | 1.22 (0.85-1.73) | 1.45 (1.10-1.90) |
| <b>Cure</b>                            |                         |                  |                  |                         |                  |                  |
| Non-beneficiaries                      | 1.00                    | 1.00             | 1.00             | 1.00                    | 1.00             | 1.00             |
| Beneficiaries                          | 1.08 (0.87-1.35)        | 1.06 (0.71-1.59) | 1.40 (1.09-1.79) | 1.26 (1.02-1.56)        | 1.13 (0.80-1.60) | 1.39 (1.06-1.81) |

<sup>1</sup> The average treatment effect was estimated in the propensity score matched (PSM) and inverse probability of the treatment weight (IPTW) analyses.

<sup>2</sup>OR and 95%CI estimated using logistic regression with further adjustment for income.

<sup>3</sup>Completing the minimum number of doses:  $\geq 6$  for PB or  $\geq 12$  for MB.

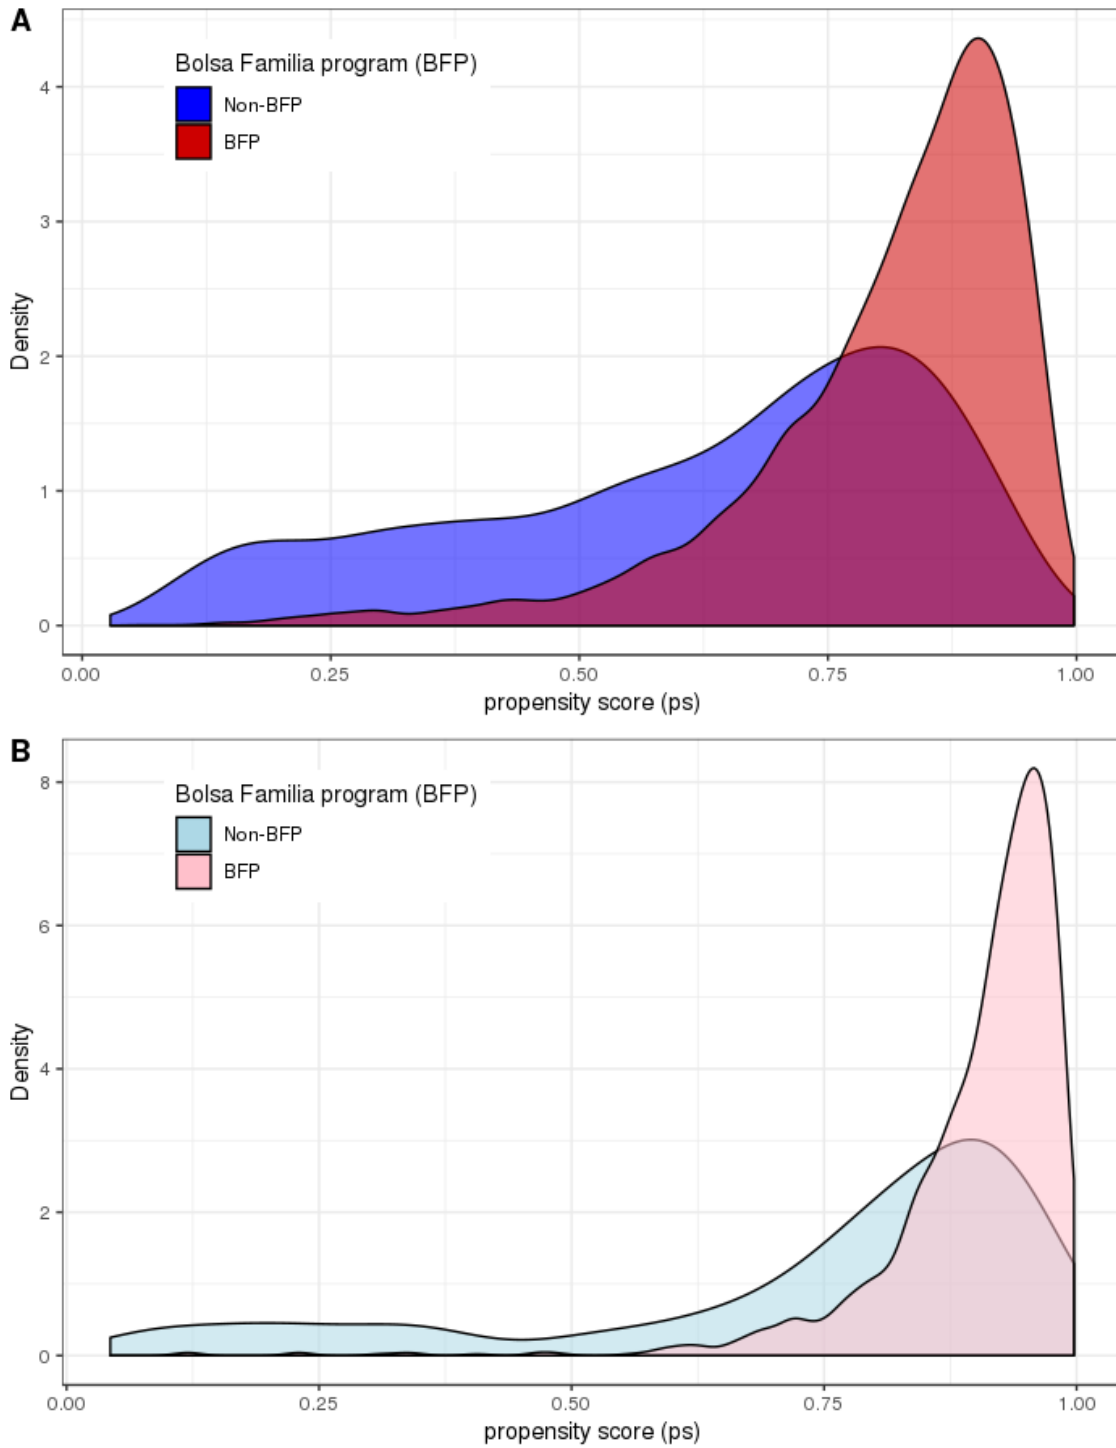

**Figure S1** Probability of receiving BFP for BFP beneficiaries and non-beneficiaries given covariates for the overall population (A) and for children under 15 years (B).
